# Supplementary material for: Comprehensive evaluation of non-conventional lanthanum phosphate nanospheres inside water-in-oil microemulsion scaffolds and their utilization in the assessment of surfactant-free TiO2-based Pickering emulsion formulations
Source: Royal Society of Chemistry journal article supplement (doi:10.1039/d4nj01403k), 2024-01-01
Supplement: d4nj01403k1.pdf [file d4nj01403k1.pdf]

## **Supporting Information**

### **A comprehensive study into the evaluation of non-conventional lanthanum phosphate nanospheres, inside a water-pool of reverse micellar scaffolds: employed in sensory assessment of surfactant free TiO<sub>2</sub> based Pickering emulsion formulation**

Trishna Mandal<sup>a</sup>, Sk Meheubub Rahaman<sup>a\*</sup>, Bipasha Saha<sup>b</sup>, Nargis Khatun<sup>a</sup>, Arnab Patra<sup>a</sup>, Arnab Mukherjee<sup>c</sup>, Mahasweta Nandi<sup>b</sup>, Debasis Dhak<sup>c</sup>, Sanjay Roy<sup>d</sup>, Bidyut Saha<sup>a\*</sup>

<sup>a</sup>Colloid Chemistry Laboratory, Department of Chemistry, The University of Burdwan, Golapbag, Burdwan-713104, West Bengal, India; [bsaha@chem.buruniv.ac.in](mailto:bsaha@chem.buruniv.ac.in) and 9476341691 (B. Saha); [smrahaman@scholar.buruniv.ac.in](mailto:smrahaman@scholar.buruniv.ac.in) and 8016288873 (S.M. Rahaman).

<sup>b</sup>Integrated Science Education and Research Centre, Siksha Bhavana, Visva-Bharati University, Santiniketan-731235, India.

<sup>c</sup>Department of Chemistry, Sidho-Kanho-Birsha University, Purulia 723104, India.

<sup>d</sup>Department of Chemistry, School of Sciences, Kalyani Regional Centre, Netaji Subhas Open University, West Bengal, India.

## Supplementary Material: Figures

**Fig. S1.**

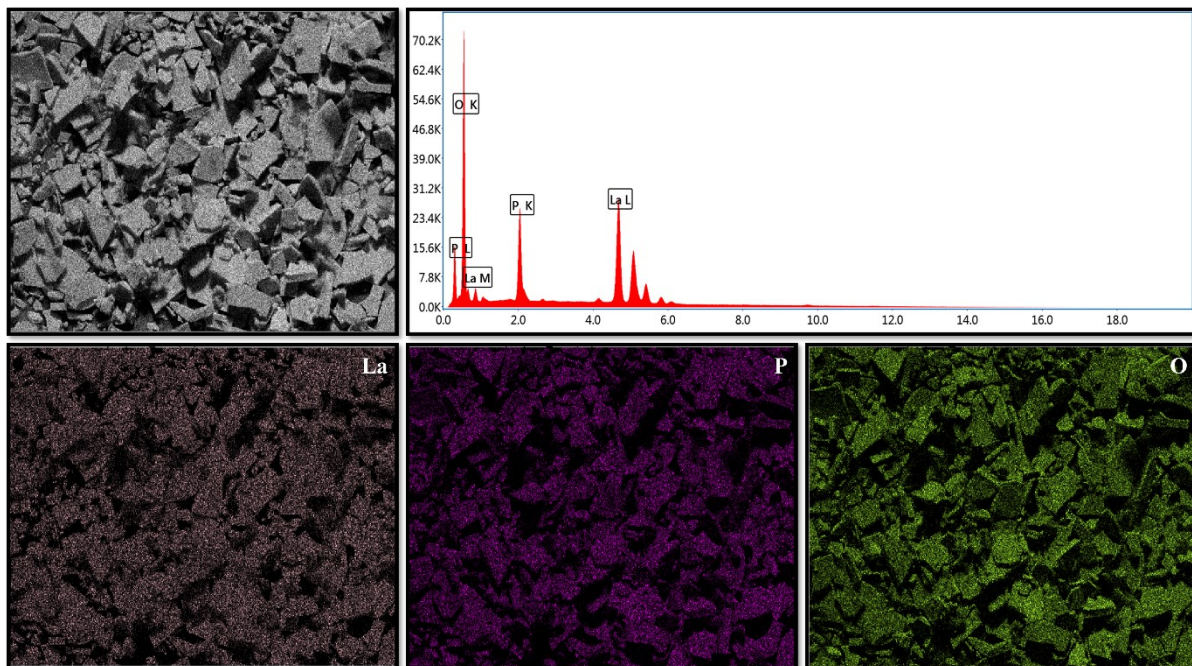

**Fig. S1.** Energy dispersive X-ray (EDX) and electron mapping analysis (after 60 min of reactions) of  $\text{LaPO}_4$  nanospheres, synthesised from reverse micellar media of Tween 20/1-butanol/toluene/lanthanum phosphate.

**Fig. S2.**

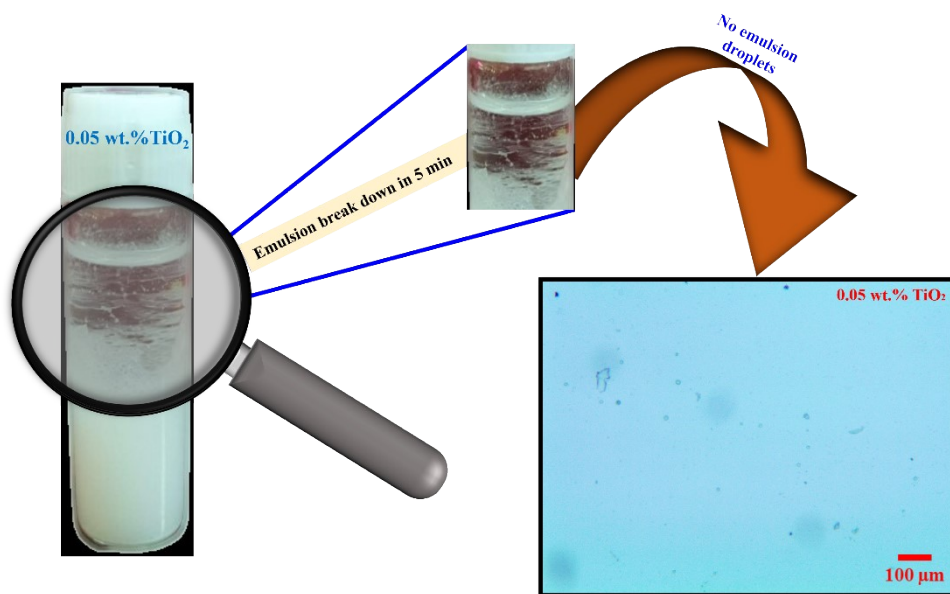

**Fig. S2.** An unstable O/W Pickering emulsion, formed by only 0.05 wt.% of  $\text{TiO}_2$ .

**Fig. S3.**

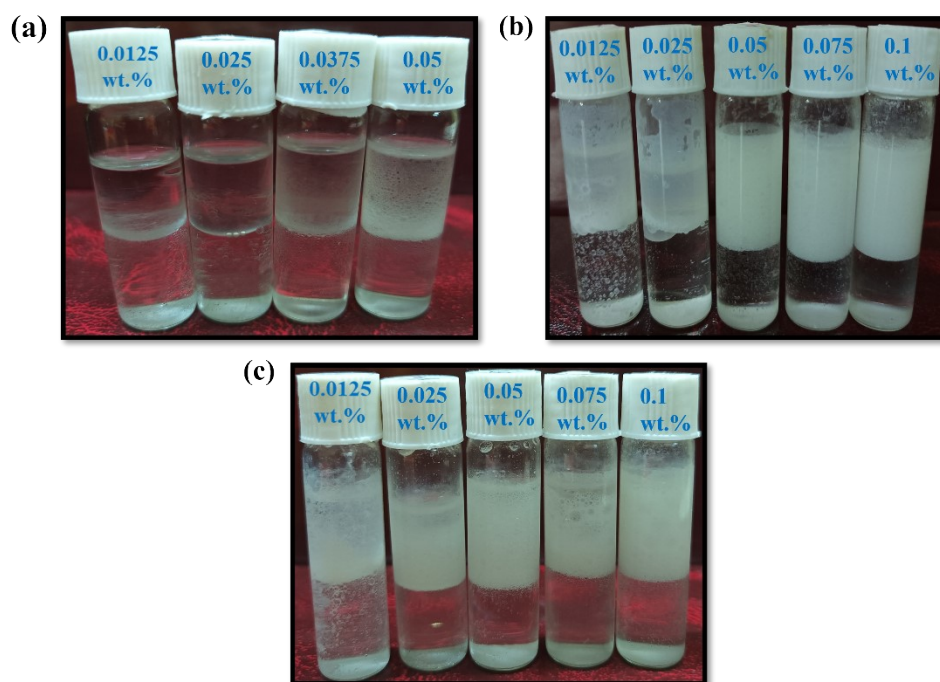

**Fig. S3.** Digital photographs of Pickering emulsion stabilised by (a) different wt.% LaPO<sub>4</sub> nanospheres only, (b) 0.05 wt.% of LaPO<sub>4</sub> nanospheres with varying wt.% of TiO<sub>2</sub>, (c) 0.05 wt.% of TiO<sub>2</sub> with different wt.% LaPO<sub>4</sub> nanospheres, after 4 weeks of standings.

**Fig. S4.**

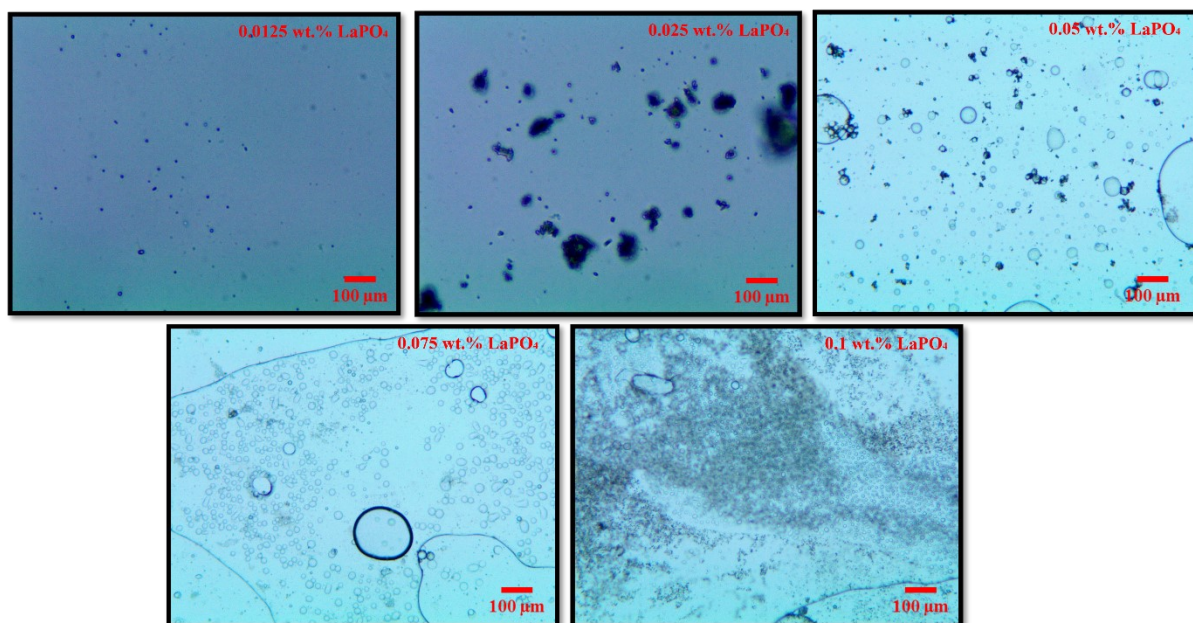

**Fig. S4.** Optical Micrographs of Pickering emulsion stabilized by different wt.% of LaPO<sub>4</sub>, *in situ* hydrophobized with a constant amount (0.05 wt.%) of TiO<sub>2</sub> nanoparticles after 2 hr of standings.

Fig. S5.

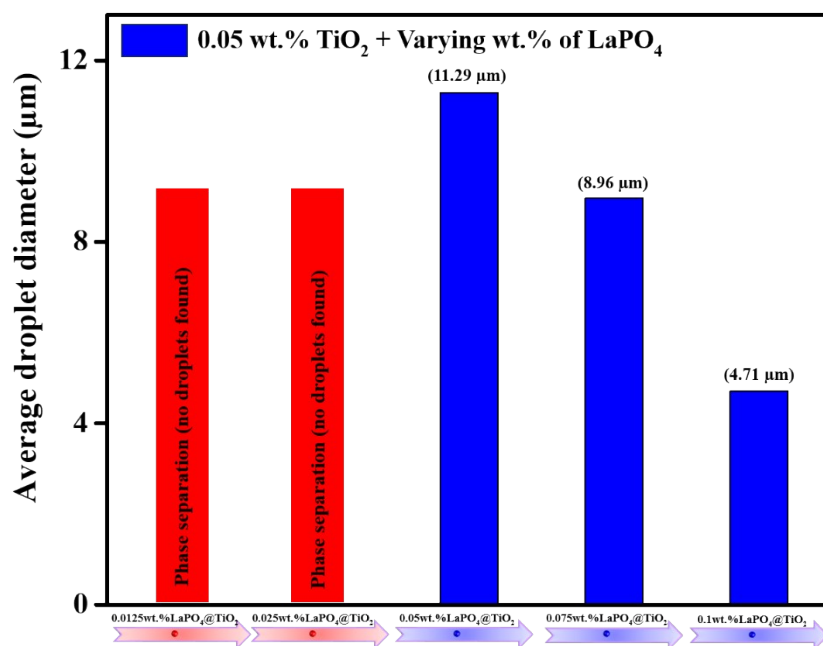

**Fig. S5.** Variation of droplets diameter of the prepared Pickering emulsion, stabilised by different wt.% of LaPO<sub>4</sub>, *in situ* hydrophobized with a constant amount (0.05 wt.%) of TiO<sub>2</sub> nanoparticles after 2 hr of standings.
